# Supplementary material
Source: publisher figshare collection journal article supplement (https://acs.figshare.com/ndownloader/files/23425964)
Supplement: Supplementary file 1 [file 23425964]

## Supporting Information

### Building a Cycle-Stable Fe-Si alloy/Carbon Nanocomposite Anode for Li-Ion Batteries through a Covalent Bonding Method

*Hui Wang<sup>a</sup>, Sijia Fan<sup>a</sup>, Yuliang Cao<sup>a</sup>, Hanxi Yang<sup>a</sup>, Xinping Ai<sup>\*a</sup>, Faping*

*Zhong<sup>\*b</sup>*

<sup>a</sup> Hubei Key Lab of Electrochemical Power Sources, College of Chemistry &  
Molecular Science, Wuhan University, Wuhan, 430072, China.

<sup>b</sup> National Engineering Research Center of Advanced Energy Storage  
Materials, Changsha, 410205, China

**\*Corresponding Author**

E-mail address: xpai@whu.edu.cn (X. Ai), zfp@corun.com (F. Zhong)

## Supplementary tables and figures

Table S1. Chemical composition of the pristine Fe-Si alloy measured by XRF

| Element                   | Si    | Fe    | O   | Ca   | Al   | C    | P     | Other<br>impurities |
|---------------------------|-------|-------|-----|------|------|------|-------|---------------------|
| Mass percentage<br>(wt.%) | 71.43 | 19.59 | 4.8 | 1.94 | 1.05 | 0.51 | 0.346 | 0.334               |

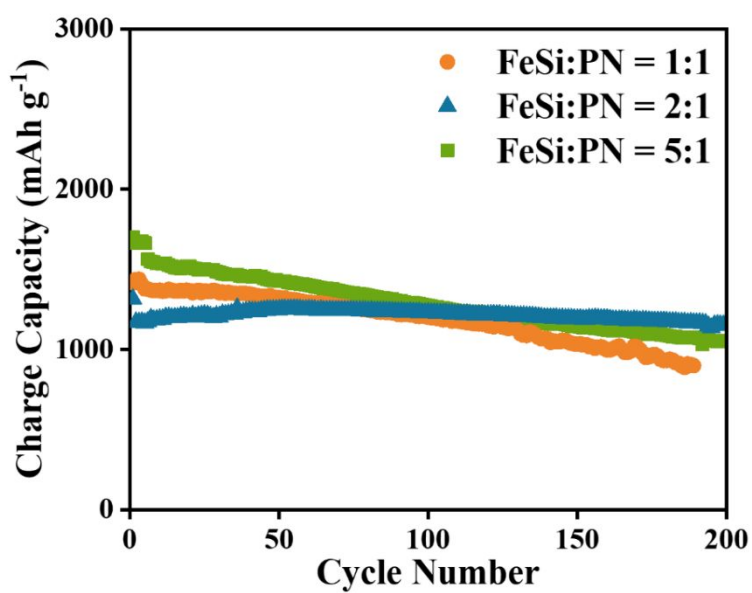

**Figure S1.** Cycling performance of the Fe-Si/C composites prepared with different Fe-Si/PN weight ratios at a current density of 2.0 A g<sup>-1</sup>.

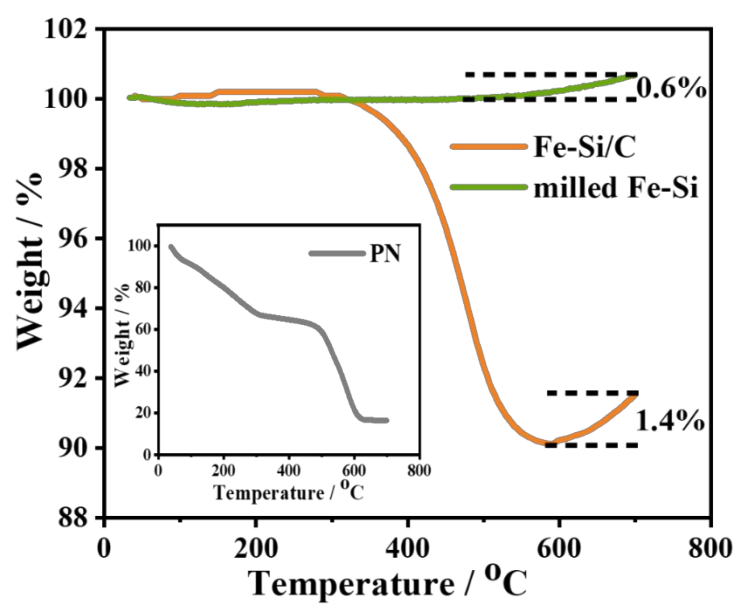

**Figure S2.** TG curves of the Fe-Si/C composite, sand-milled pristine Fe-Si alloy particles and pure PN polymer (inset) under air atmosphere.

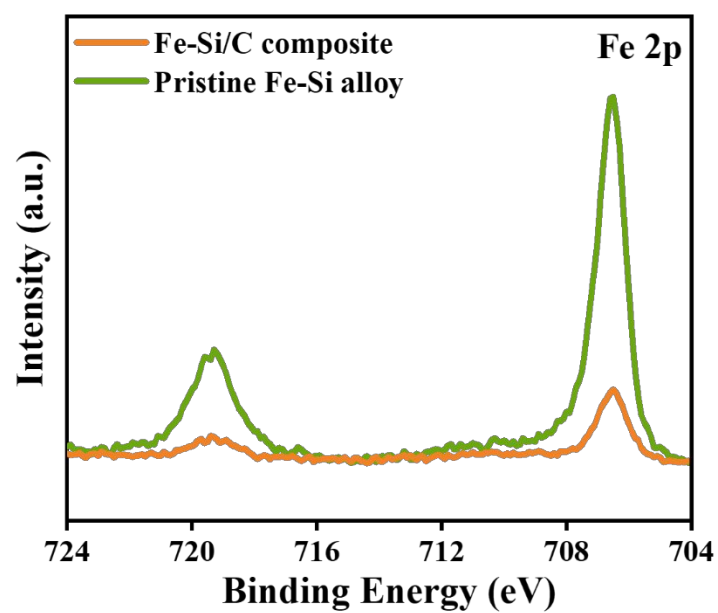

**Figure S3.** Fe 2p XPS spectra of the Fe-Si/C composite and the pristine Fe-Si alloy particles.

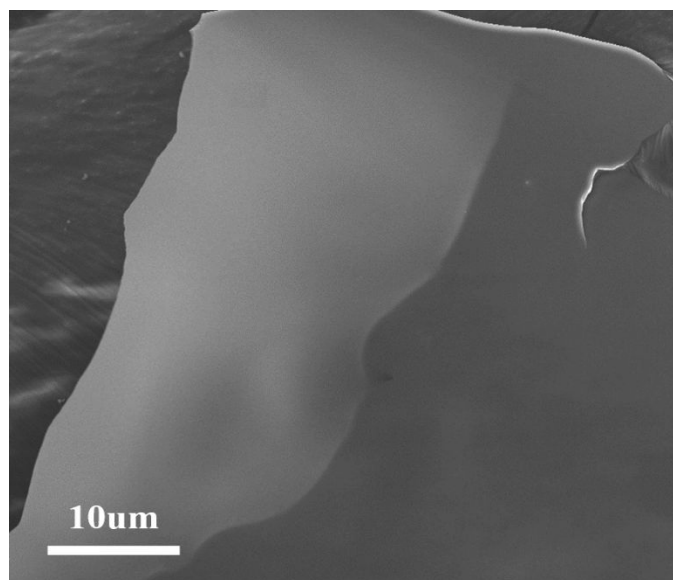

**Figure S4.** SEM image of the PN-derived carbon.

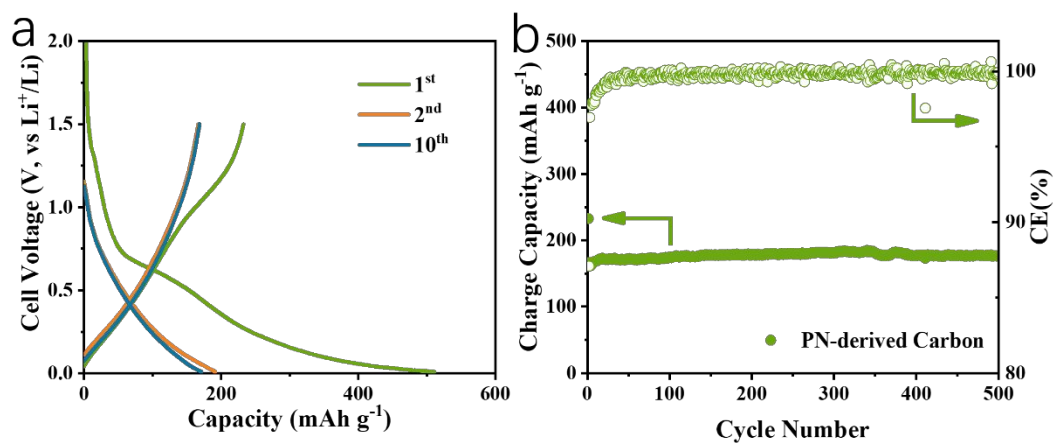

**Figure S5.** Cycle performance and charge/discharge profile of the PN-derived carbon electrode in the Li-half cell at a current density of  $200 \text{ mA g}^{-1}$  in the voltage interval of 0 – 1.5 V.

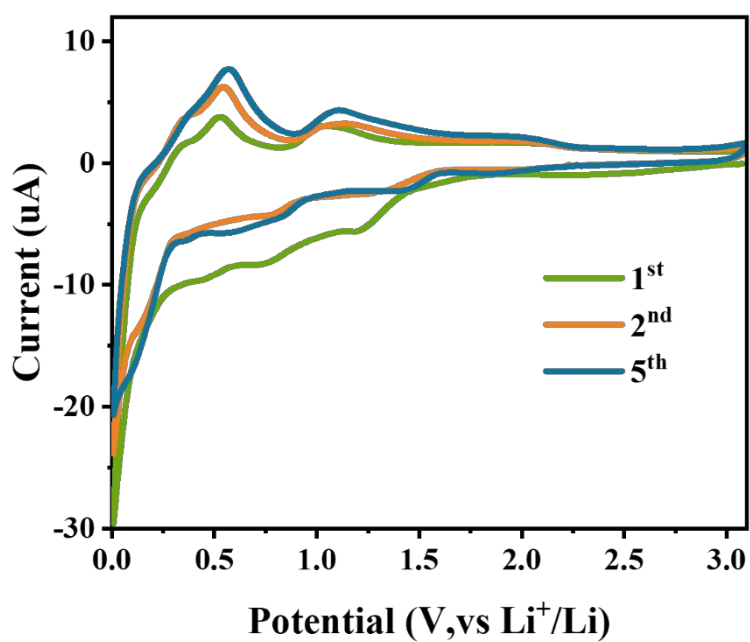

**Figure S6.** CV curves of the Fe-Si/C anode obtained at a scan rate of  $0.05 \text{ mV s}^{-1}$ .

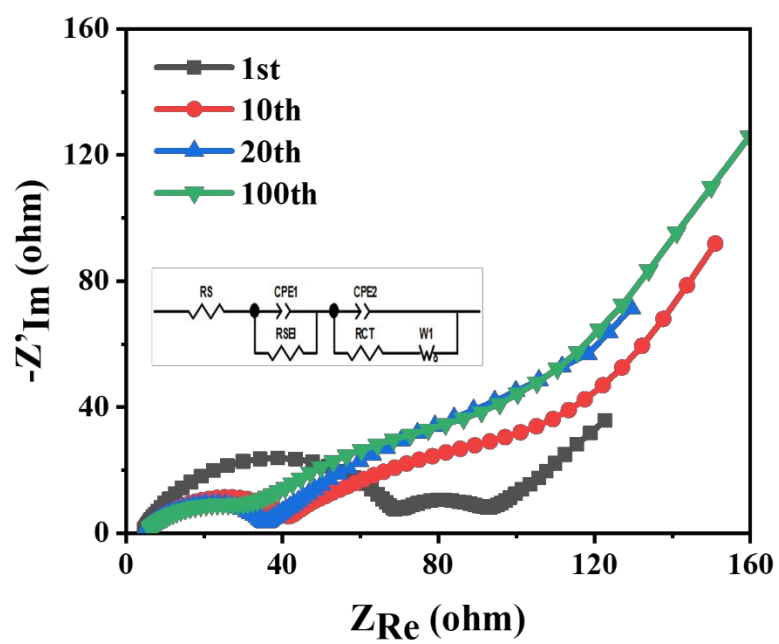

**Figure S7.** Nyquist plots of the Fe-Si/C anode at different cycles.
